# Supplementary material for: Characterization of the Probiotic Yeast Saccharomyces boulardii in the Healthy Mucosal Immune System
Source: PLoS One. 2016 Apr 11;11(4):e0153351. doi: 10.1371/journal.pone.0153351 (PMC4827847; doi:10.1371/journal.pone.0153351)
Supplement: S2 Table — Processes enriched among S. boulardii ATCC MYA-797 genes with exonic indels and amino acid substitutions compared to S. cerevisiae sacCer3, as determined by gene ontology analysis using the Saccharomyces genome database (http://www.yeastgenome.org/) [26]. (XLSX) [file pone.0153351.s006.xlsx]

## Sheet: Sheet1
Gene Ontology Term	P value	Number of genes
single-organism process [GO:0044699]	5.4e-31	2534
single-organism cellular process [GO:0044763]	7.24366e-24	2305
cell cycle [GO:0007049]	1.74489e-15	564
cell cycle process [GO:0022402]	2.1645e-15	501
biological regulation [GO:0065007]	1.41645e-14	1287
regulation of biological process [GO:0050789]	2.80479e-13	1130
regulation of cellular process [GO:0050794]	2.66265e-12	1071
response to stimulus [GO:0050896]	1.12866e-08	824
DNA metabolic process [GO:0006259]	1.24673e-08	391
cellular response to stimulus [GO:0051716]	8.95362e-08	721
regulation of metabolic process [GO:0019222]	9.46429e-08	849
single organism reproductive process [GO:0044702]	1.47727e-07	276
reproductive process [GO:0022414]	4.37906e-07	348
reproduction [GO:0000003]	4.48645e-07	359
meiotic cell cycle process [GO:1903046]	1.19343e-06	216
nuclear division [GO:0000280]	1.5969e-06	257
organelle fission [GO:0048285]	1.68476e-06	282
regulation of nucleobase-containing compound metabolic process [GO:0019219]	1.95912e-06	554
regulation of macromolecule metabolic process [GO:0060255]	2.21547e-06	753
positive regulation of biological process [GO:0048518]	3.06461e-06	466
regulation of cellular metabolic process [GO:0031323]	3.58652e-06	771
mitotic cell cycle [GO:0000278]	5.74492e-06	294
regulation of primary metabolic process [GO:0080090]	6.17387e-06	758
regulation of transcription, DNA-templated [GO:0006355]	1.0714e-05	499
DNA replication [GO:0006260]	1.32726e-05	170
meiotic cell cycle [GO:0051321]	1.33634e-05	233
nucleobase-containing compound biosynthetic process [GO:0034654]	1.3617e-05	669
regulation of nucleic acid-templated transcription [GO:1903506]	1.46653e-05	499
regulation of RNA biosynthetic process [GO:2001141]	1.46653e-05	499
mitotic cell cycle process [GO:1903047]	2.0667e-05	281
regulation of RNA metabolic process [GO:0051252]	3.34799e-05	508
chromosome organization [GO:0051276]	3.53801e-05	396
regulation of macromolecule biosynthetic process [GO:0010556]	4.33048e-05	608
regulation of cellular macromolecule biosynthetic process [GO:2000112]	4.38016e-05	603
regulation of transcription from RNA polymerase II promoter [GO:0006357]	5.78277e-05	326
meiotic nuclear division [GO:0007126]	7.30651e-05	134
regulation of cellular biosynthetic process [GO:0031326]	7.84582e-05	624
cellular component morphogenesis [GO:0032989]	9.29967e-05	91
aromatic compound biosynthetic process [GO:0019438]	9.31452e-05	707
regulation of biosynthetic process [GO:0009889]	0.000101868	624
external encapsulating structure organization [GO:0045229]	0.00024336	168
cell wall organization [GO:0071555]	0.00024336	168
heterocycle biosynthetic process [GO:0018130]	0.000290459	717
positive regulation of metabolic process [GO:0009893]	0.000304767	390
cell wall organization or biogenesis [GO:0071554]	0.000312116	197
cellular component organization [GO:0016043]	0.000404282	1386
regulation of nitrogen compound metabolic process [GO:0051171]	0.000499342	630
negative regulation of cellular process [GO:0048523]	0.0005583	385
signaling [GO:0023052]	0.000835867	246
cellular component assembly involved in morphogenesis [GO:0010927]	0.000868423	64
regulation of gene expression [GO:0010468]	0.000993582	585
signal transduction [GO:0007165]	0.001041	245
single organism signaling [GO:0044700]	0.001041	245
organic cyclic compound biosynthetic process [GO:1901362]	0.001094	741
cell communication [GO:0007154]	0.001134	322
DNA recombination [GO:0006310]	0.001469	181
positive regulation of cellular process [GO:0048522]	0.001509	400
localization [GO:0051179]	0.001629	969
transcription, DNA-templated [GO:0006351]	0.001639	523
RNA biosynthetic process [GO:0032774]	0.001712	526
nucleic acid-templated transcription [GO:0097659]	0.002114	523
transcription from RNA polymerase II promoter [GO:0006366]	0.002964	362
nucleic acid metabolic process [GO:0090304]	0.003318	1125
negative regulation of biological process [GO:0048519]	0.003523	390
cellular protein modification process [GO:0006464]	0.003542	518
protein modification process [GO:0036211]	0.003542	518
cell division [GO:0051301]	0.004584	258
reciprocal meiotic recombination [GO:0007131]	0.005055	54
reciprocal DNA recombination [GO:0035825]	0.005055	54
cellular developmental process [GO:0048869]	0.005564	187
positive regulation of transcription, DNA-templated [GO:0045893]	0.005588	228
positive regulation of RNA biosynthetic process [GO:1902680]	0.005588	228
positive regulation of nucleic acid-templated transcription [GO:1903508]	0.005588	228
DNA-dependent DNA replication [GO:0006261]	0.008596	103
positive regulation of RNA metabolic process [GO:0051254]	0.009036	233
developmental process [GO:0032502]	0.011622	239
single-organism developmental process [GO:0044767]	0.012096	237
negative regulation of nucleobase-containing compound metabolic process [GO:0045934]	0.012935	224
nucleobase-containing compound metabolic process [GO:0006139]	0.013013	1269
multi-organism process [GO:0051704]	0.013935	220
regulation of cell cycle [GO:0051726]	0.015392	175
regulation of signaling [GO:0023051]	0.015559	101
positive regulation of nucleobase-containing compound metabolic process [GO:0045935]	0.016455	248
anatomical structure morphogenesis [GO:0009653]	0.017532	163
anatomical structure development [GO:0048856]	0.017532	163
